# Supplementary material for: Different HSP90 Inhibitors Exert Divergent Effect on Myxoid Liposarcoma In Vitro and In Vivo
Source: MDPI journal article supplement (doi:10.3390/biomedicines10030624), 2022-03-07
Supplement: s1 [file s1]

## Supplementary figures and tables

Figure S1

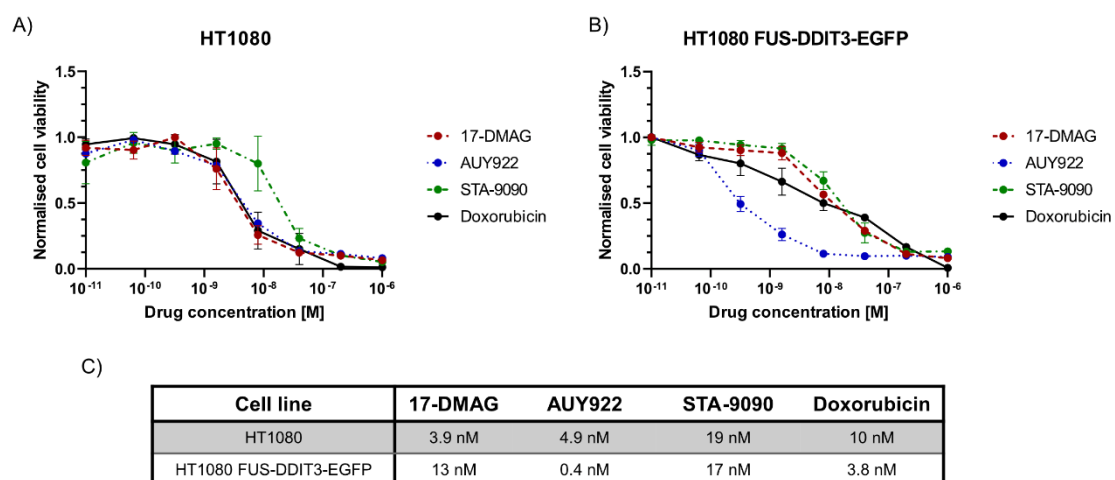

**Figure S1.** Effect of HSP90 inhibitors *in vitro*.

**A-B.** Cell viability assays of the HSP90 inhibitors 17-DMAG, AUY922 and STA-9090 and the chemotherapeutic agent Doxorubicin on fibrosarcoma cell line HT1080 and HT1080-FUS-DDIT3-EGFP. Data is normalized to untreated controls. Mean  $\pm$  SD is shown.

**C.** Table of IC<sub>50</sub> values of tested compounds on HT1080 and HT1080-FUS-DDIT3-EGFP.

Figure S2

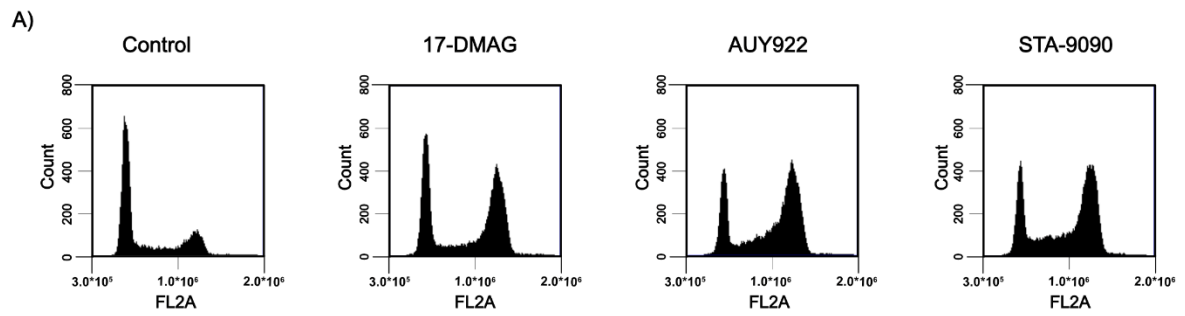

B)

| Cell cycle phase | Control | 17-DMAG | AUY922 | STA-9090 |
|------------------|---------|---------|--------|----------|
| G1               | 59 %    | 32 %    | 21 %   | 20 %     |
| S                | 19 %    | 18 %    | 25 %   | 27 %     |
| G2               | 22 %    | 50 %    | 54 %   | 53 %     |

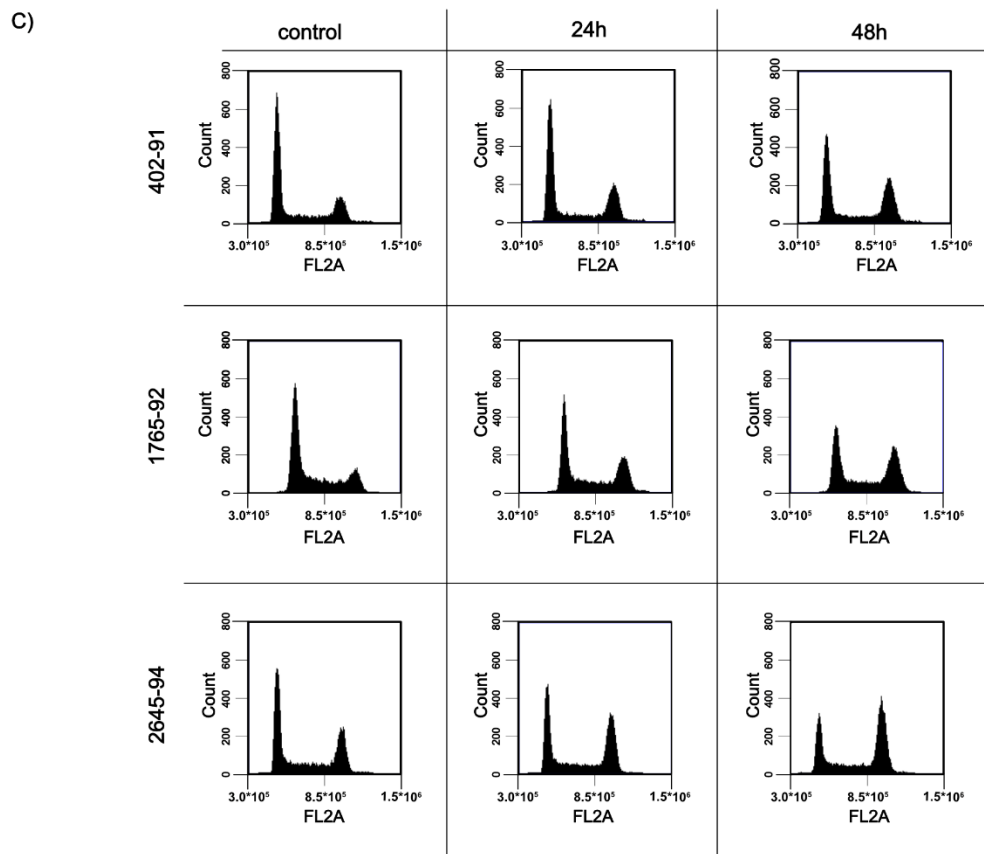

D)

| Cell cycle phase | 402-91  |      |      | 1765-92 |      |      | 2645-94 |      |      |
|------------------|---------|------|------|---------|------|------|---------|------|------|
|                  | Control | 24 h | 48 h | Control | 24 h | 48 h | Control | 24 h | 48 h |
| G1               | 58 %    | 54 % | 44 % | 49 %    | 41 % | 34 % | 45 %    | 37 % | 28 % |
| S                | 19 %    | 17 % | 20 % | 31 %    | 27 % | 26 % | 24 %    | 23 % | 23 % |
| G2               | 23 %    | 29 % | 36 % | 20 %    | 32 % | 40 % | 31 %    | 40 % | 49 % |

**Figure S2.** Cell cycle analysis using flow cytometry.

**A.** Raw data for Fig **1F**. Plots showing PI-intensity (FL2A) vs count. First peak indicates cells in G1 phase, second peak cells in G2 phase and the intermediate region cells in S phase.

**B.** Raw data for Fig **1F**. Table summarizing cell cycle distribution upon different treatment conditions.

**C.** Raw data for Fig **1G**. Plots showing PI-intensity (FL2A) vs count. First peak indicates cells in G1 phase, second peak cells in G2 phase and the intermediate region cells in S phase.

**D.** Raw data for Fig **1G**. Table summarizing cell cycle distribution upon different treatment conditions.

Figure S3

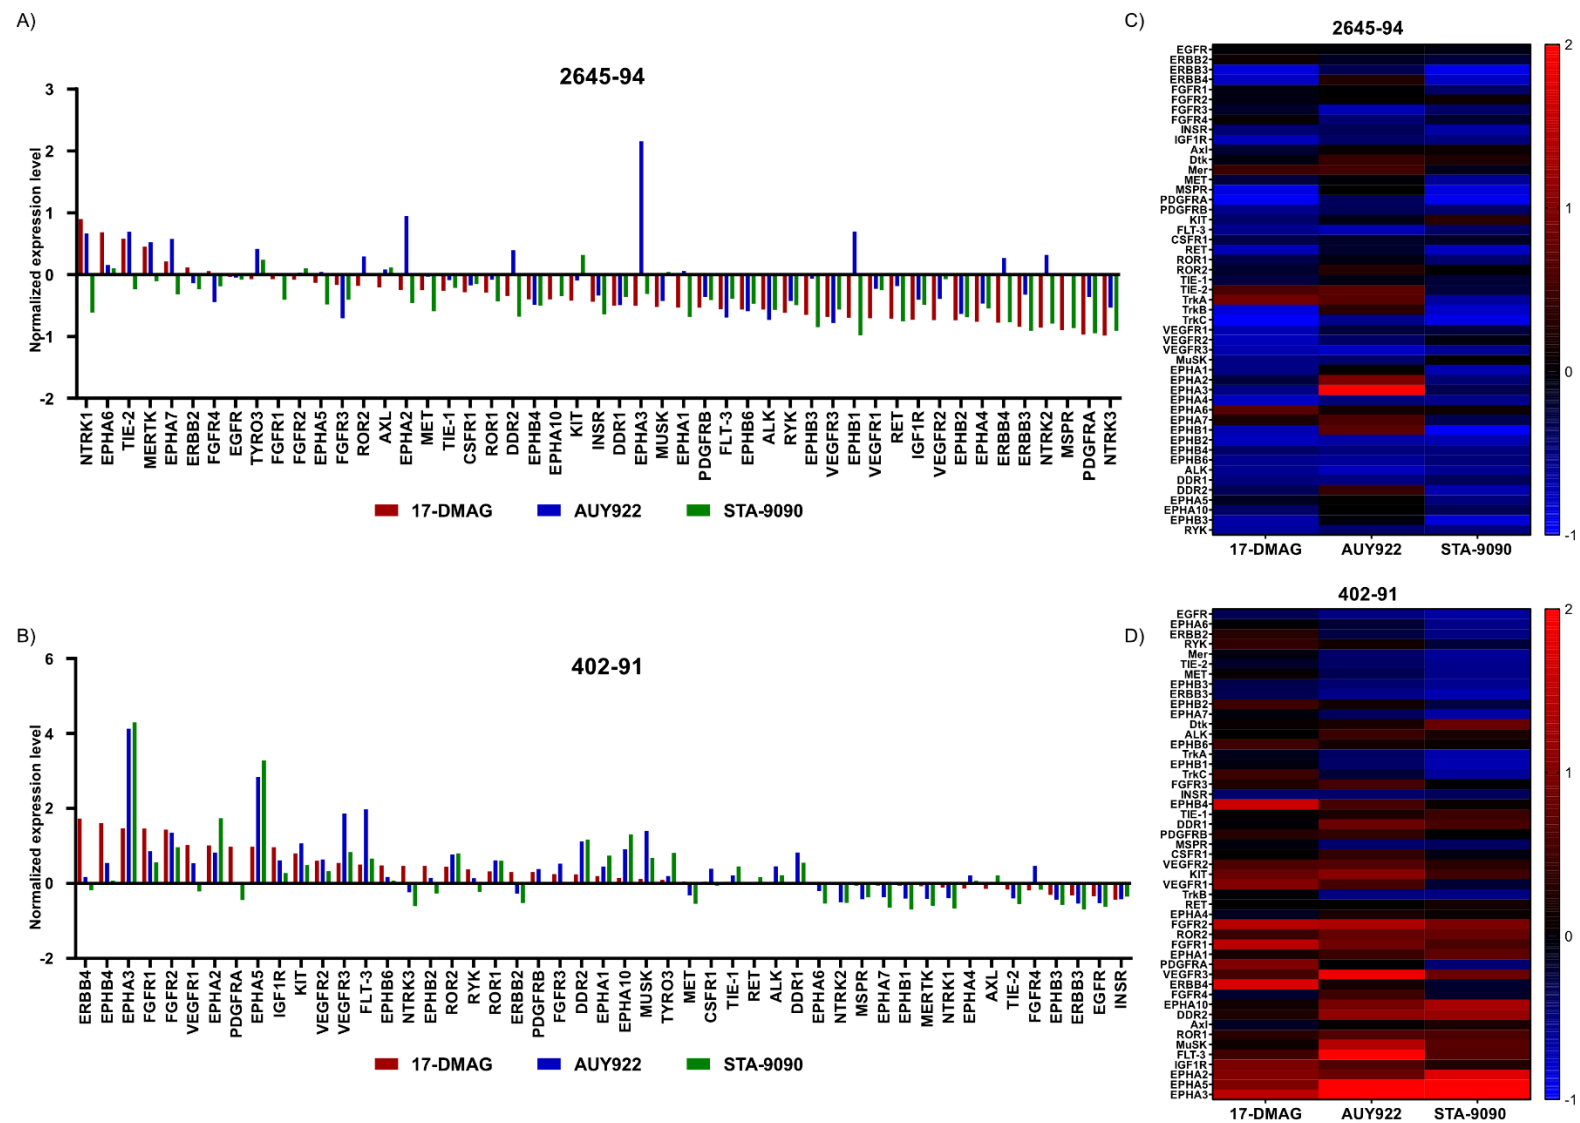

**Figure S3.** Phospho-RTK analysis of 49 phospho-RTKs in MLS2645-94 and 402-91 upon HSP90 inhibition with 100 nM 17-DMAG, 50 nM AUY922 or 80 nM STA-9090 for 24 h. Data presented as bar charts of mean relative expression of two measurements, compared with untreated control (**A-B**) and heat maps, where blue color indicates downregulation and red color indicates upregulation (**C-D**).

Figure S4

## 402-91

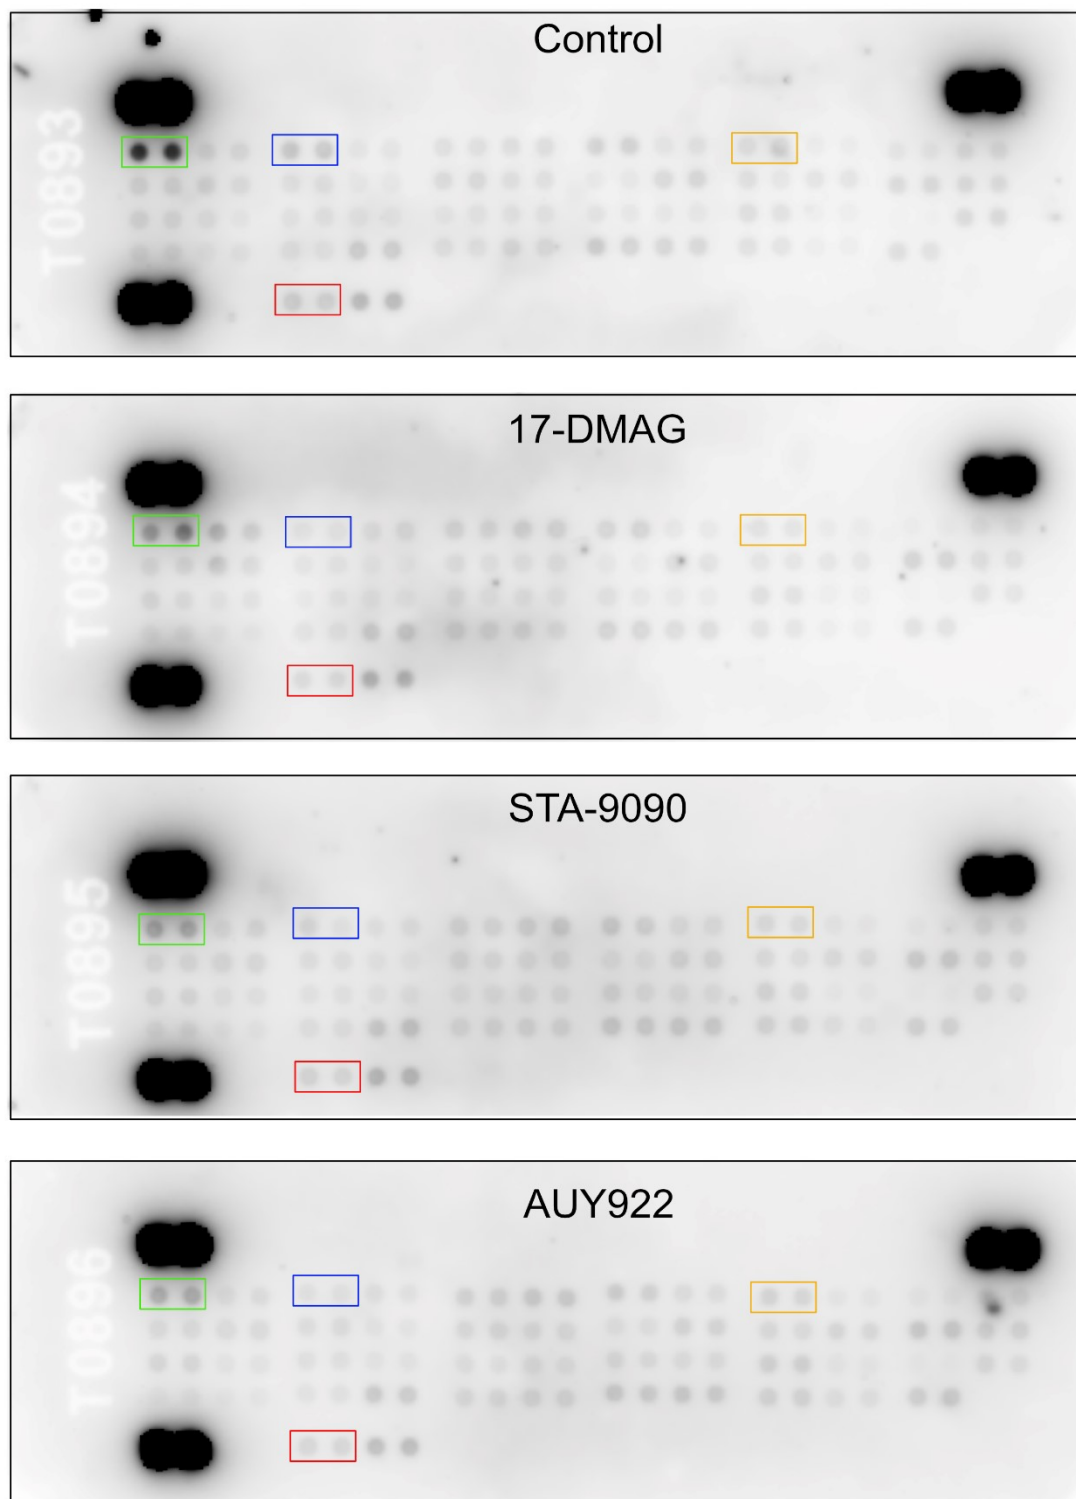

**Figure S4.** Raw data for pRTK analysis of MLS cell line 402-91 upon HSP90 inhibition with 100 nM 17-DMAG, 50 nM AUY922 or 80 nM STA-9090 for 24 h. Green box = EGFR. Blue box = ERBB3. Orange box = INSR. Red box = EPHB3.

Figure S5

2645-94

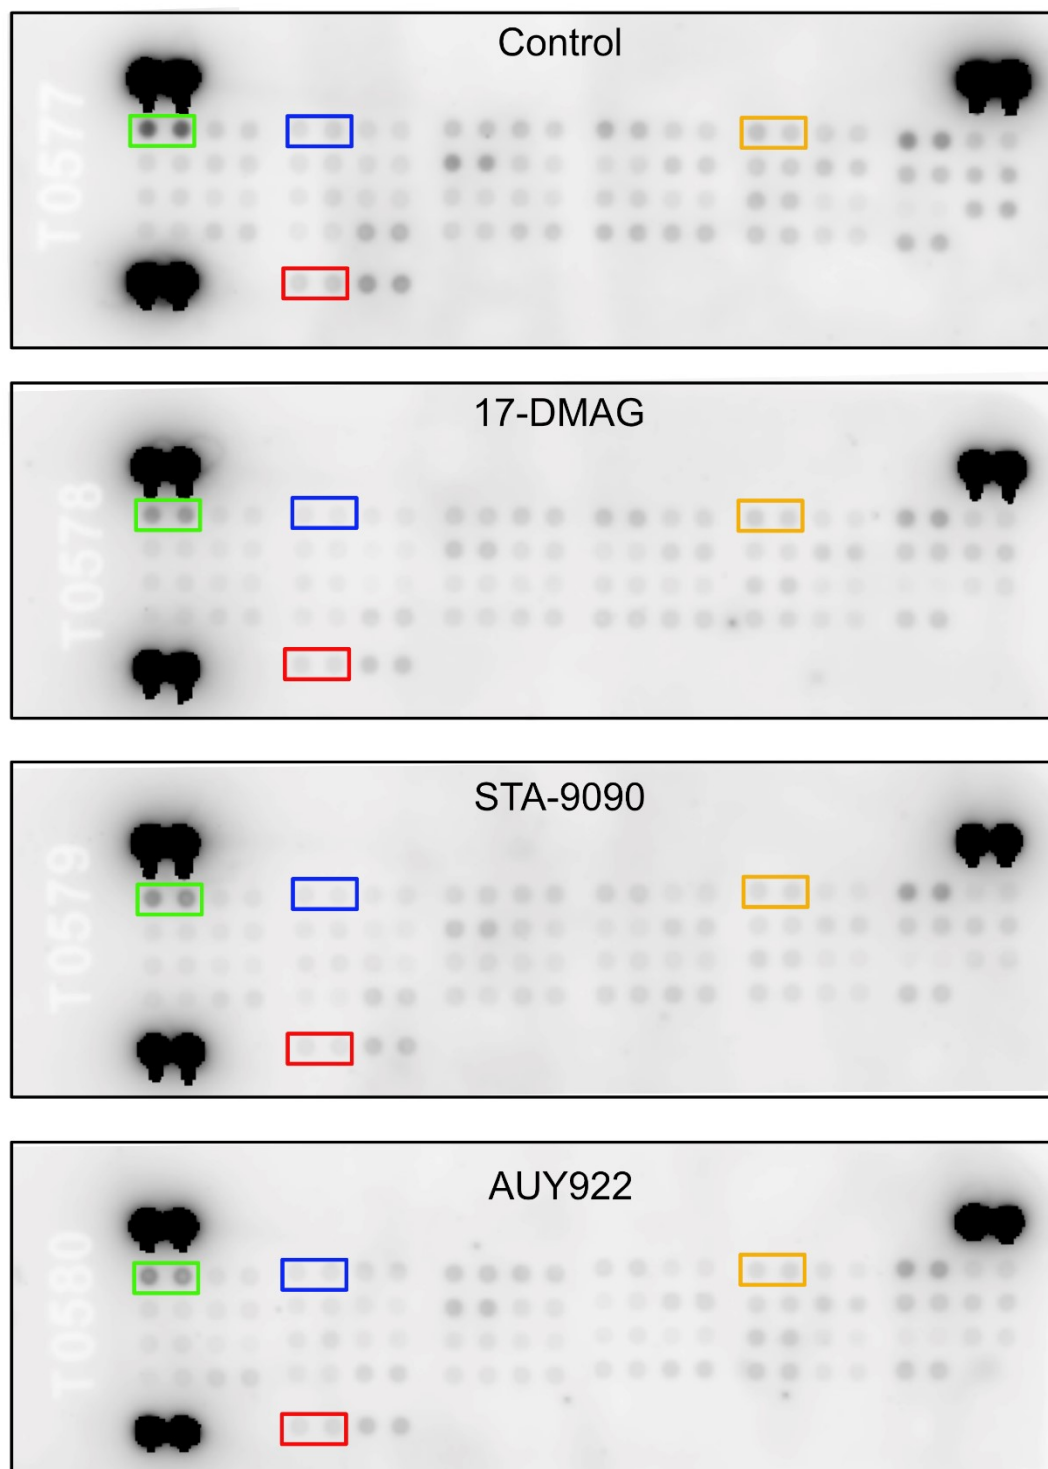

**Figure S5.** Raw data for pRTK analysis of MLS cell line 2645-94 upon HSP90 inhibition with 100 nM 17-DMAG, 50 nM AUY922 or 80 nM STA-9090 for 24 h. Green box = EGFR. Blue box = ERBB3. Orange box = INSR. Red box = EPHB3.

Figure S6

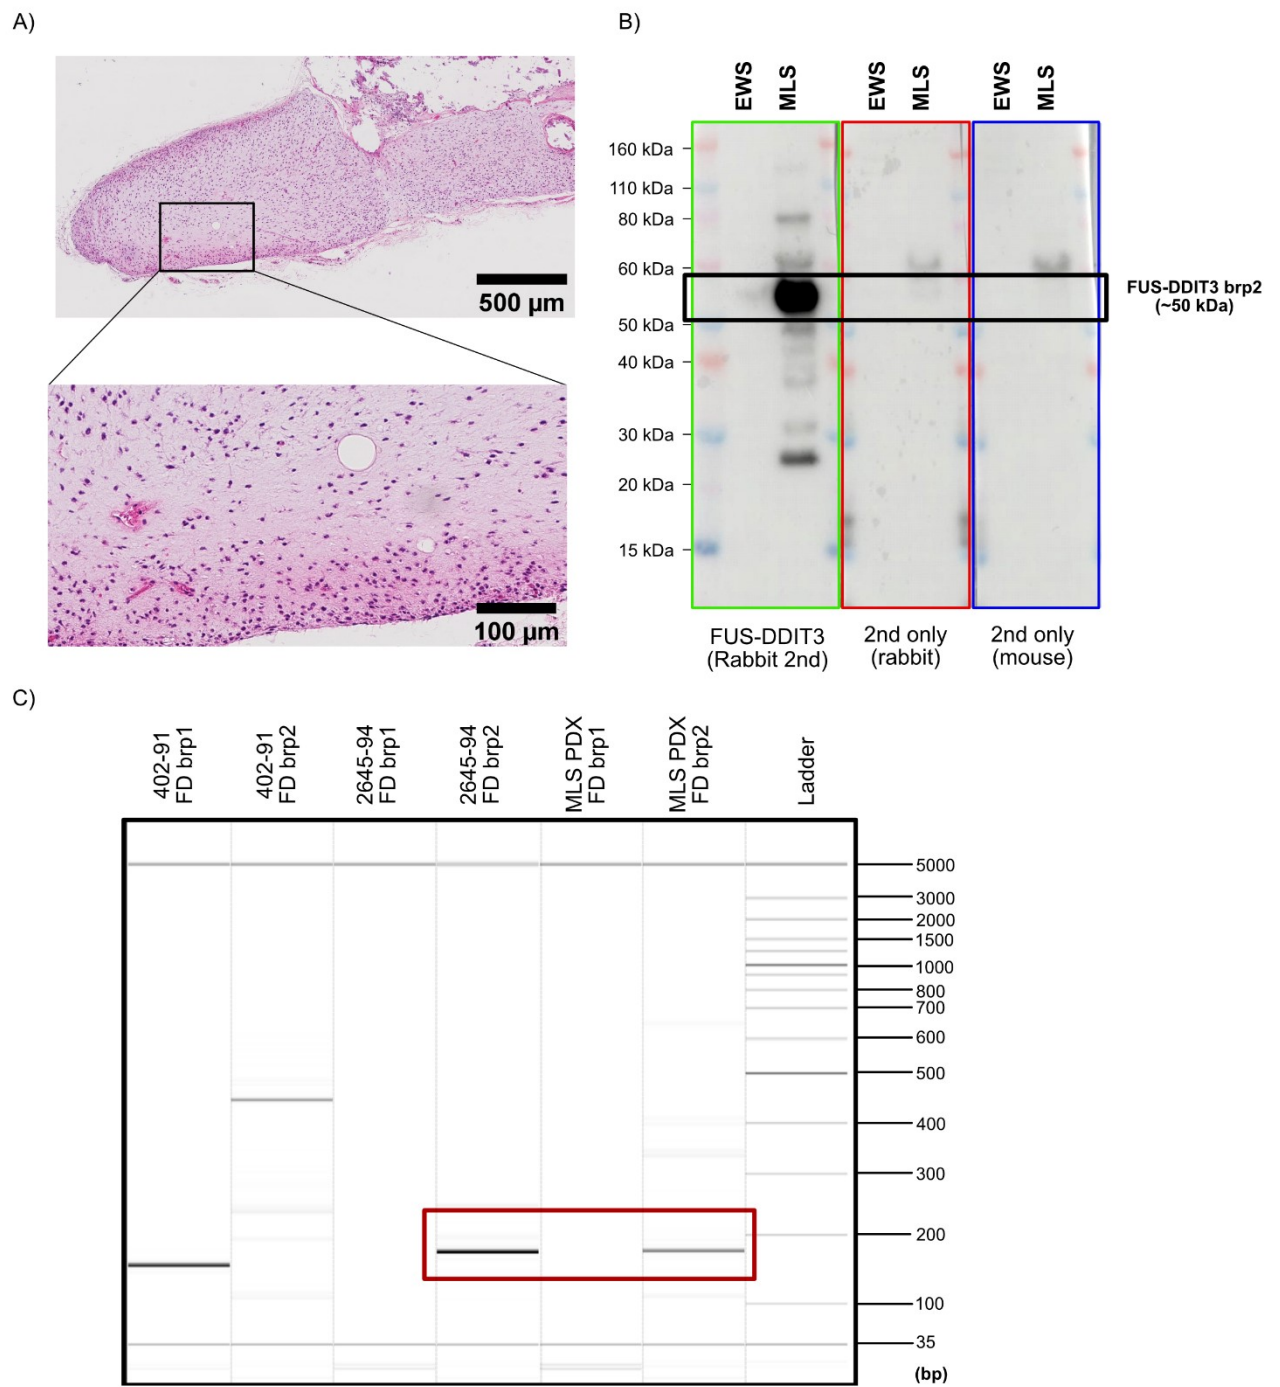



**Figure S6.** MLS PDX model.

**A.** H&E staining of an MLS PDX tumor section.

**B.** Western blot, using a DDIT3 rabbit primary antibody, detecting FUS-DDIT3. In the MLS PDX, a signal is detected at approximately 50 kDa, indicating a type 2 FUS-DDIT3 fusion oncogene. An EWS PDX, used as negative control, does not give any signal. Incubation with secondary antibodies only (Rabbit + Mouse) give an unspecific signal at approximately 60 kDa.

**C.** Analysis of PCR products of the MLS PDX using primers against type 1 and type 2 FUS-DDIT3 fusion oncogenes using Fragment Analyzer. MLS cell lines 402-91 and 2645-94, harboring a type 1 and type 2 fusion respectively, were used as positive controls. The MLS PDX harbors a type 2 FUS-DDIT3 oncogene (167 bp).

Figure S7

A)

### 17-DMAG and Doxorubicin

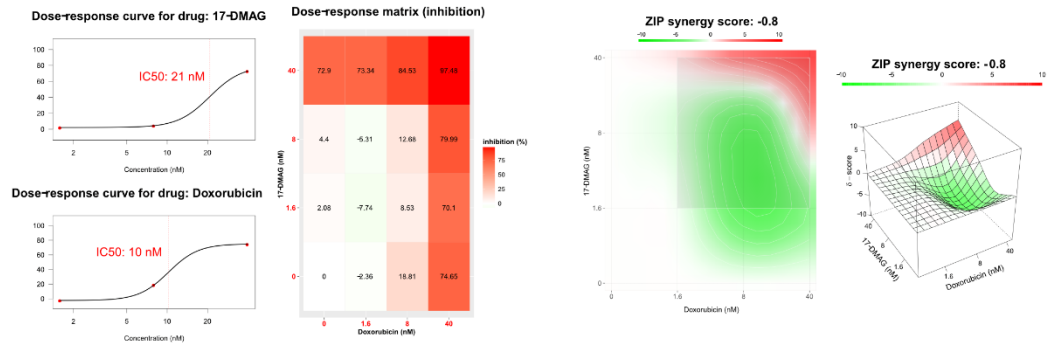

B)

### AUY922 and Doxorubicin

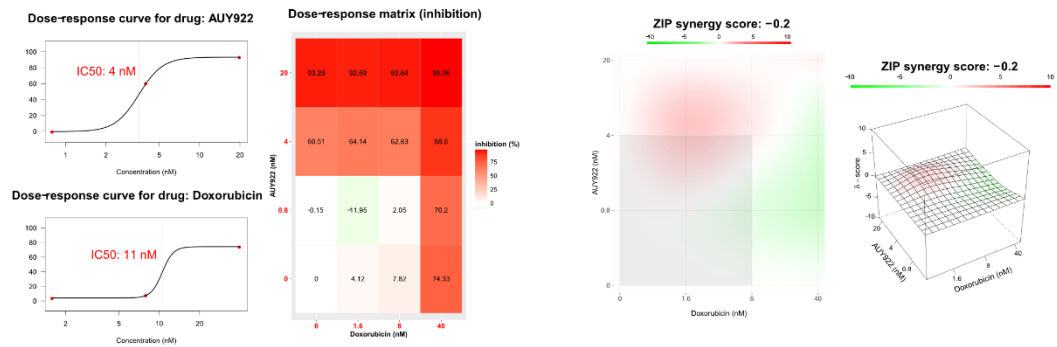

C)

### STA-9090 and Doxorubicin

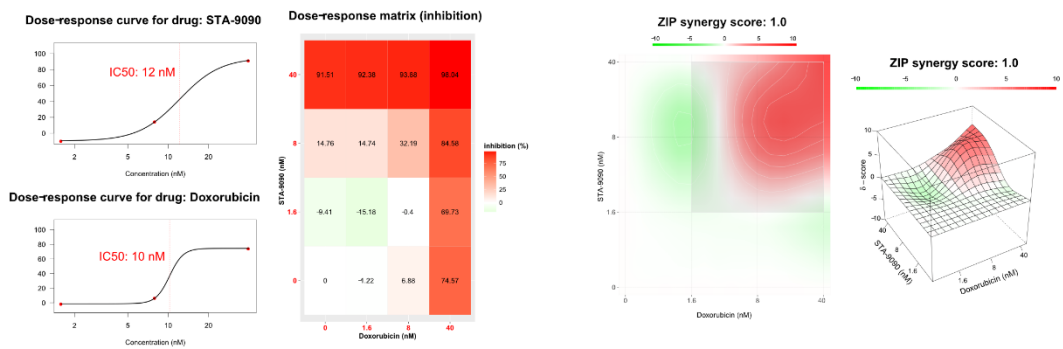

**Figure S7.** Combination cell viability assays, doxorubicin and HSP90 inhibition

**A-C.** Dose-response curves, dose-response matrixes and 2D/3D synergy matrixes on MLS 402-91 treated with 17-DMAG (**A**), AUY922 (**B**) or STA-9090 (**C**) in combination with doxorubicin at indicated doses. IC50 values are plotted in red text for each drug in the dose-response curves. Mean ZIP synergy score is displayed above 2D/3D synergy matrixes. Negative values of ZIP score indicate antagonism, 0 indicates additive drug effect and positive values indicate synergistic effect. The dose response curves and 3D synergy matrixes are also displayed in Fig **5A**, **5C** and **5E**.

Figure S8

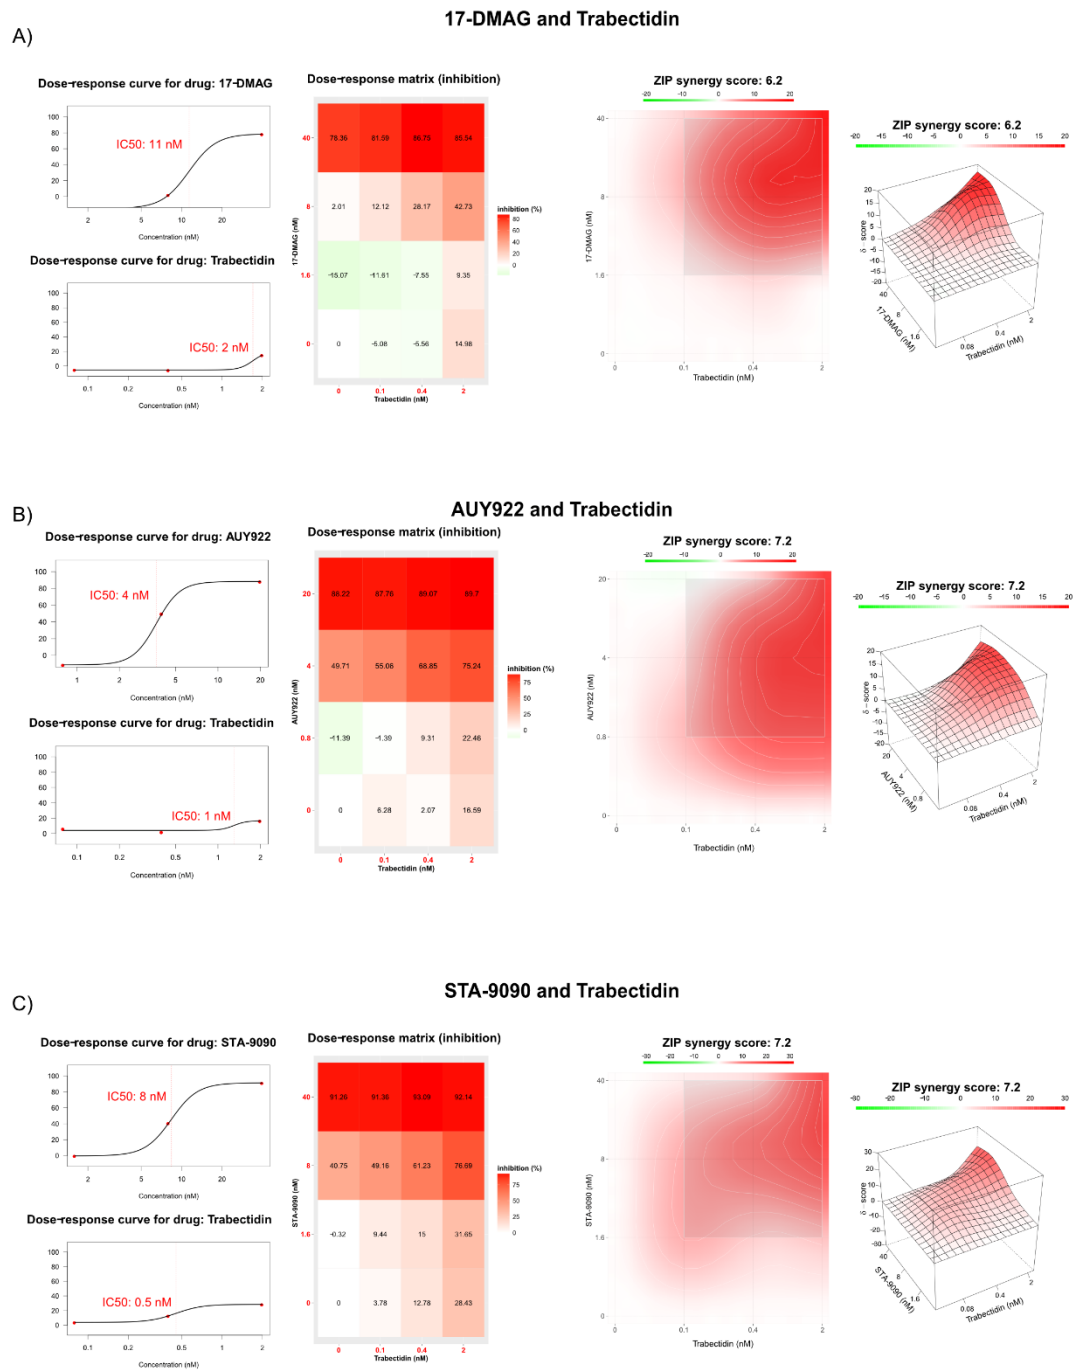

**Figure S8.** Combination cell viability assays, lower dose of trabectedin and HSP90 inhibition

**A-C.** Dose-response curves, dose-response matrixes and 2D/3D synergy matrixes on MLS 402-91 treated with 17-DMAG (**A**), AUY922 (**B**) or STA-9090 (**C**) in combination with trabectedin at indicated doses. IC50 values are plotted in red text for each drug in the dose-response curves. Mean ZIP synergy score is displayed above 2D/3D synergy matrixes. Negative values of ZIP score indicate antagonism, 0 indicates additive drug effect and positive values indicate synergistic effect. The dose response curves and 3D synergy matrixes are also displayed in Fig **5B**, **5D** and **5F**.

Figure S9

### 17-DMAG and Trabectedin

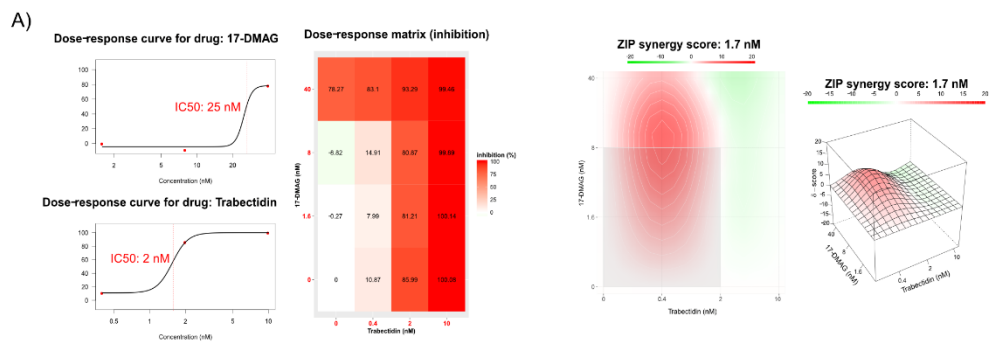

### AUY922 and Trabectedin

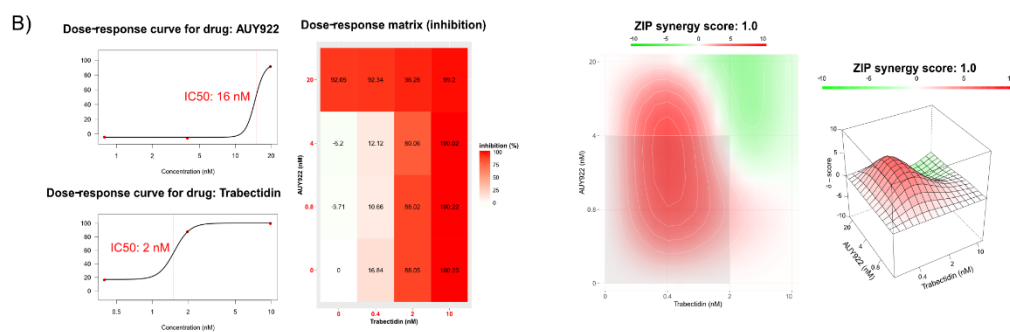

### STA-9090 and Trabectedin

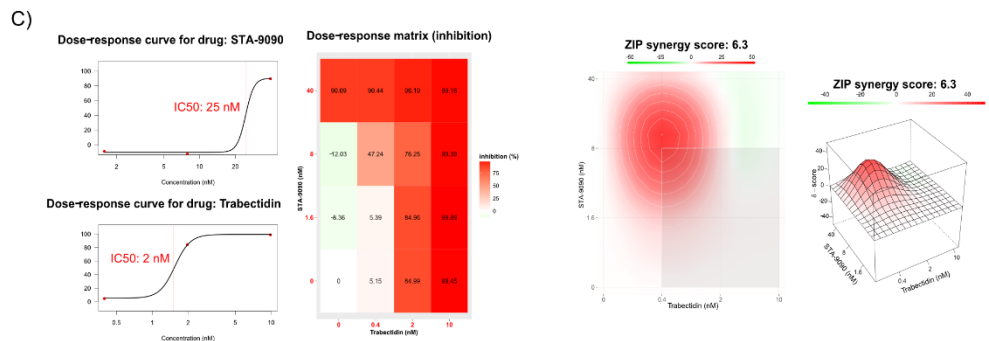

### Trabectedin and Doxorubicin

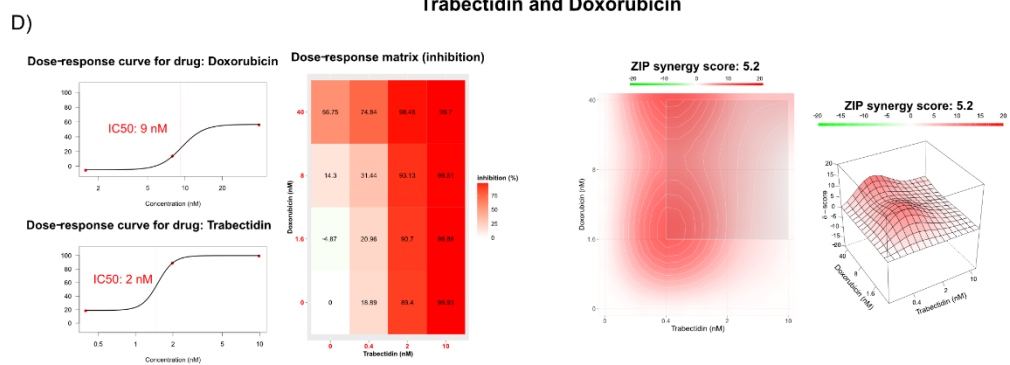

**Figure S9.** Combination cell viability assays, higher dose of trabectedin and HSP90 inhibition

**A-C.** Dose-response curves, dose-response matrixes and 2D/3D synergy matrixes on MLS 402-91 treated with 17-DMAG (**A**), AUY922 (**B**) or STA-9090 (**C**) in combination with trabectedin at indicated doses. IC<sub>50</sub> values are plotted in red text for each drug in the dose-response curves. Mean ZIP synergy score is displayed above 2D/3D synergy matrixes. Negative values of ZIP score indicate antagonism, 0 indicates additive drug effect and positive values indicate synergistic effect.

**Table S1. Morphological evaluation of H&E stained PDX tumors**

| <b>Treatment</b> | <b>Morphological analysis</b>                                                                                                                                                          |
|------------------|----------------------------------------------------------------------------------------------------------------------------------------------------------------------------------------|
| Control          | MLS morphology. Peripheral crowding. Poorly developed capillary network. Some debris. No lipoblasts. No round cell component                                                           |
| Control          | MLS morphology. Peripheral crowding. Poorly developed capillary network. Few lipoblasts. No round cell component                                                                       |
| Control          | MLS morphology. Peripheral crowding. Sparse capillary network. Some debris. Few lipoblasts. No round cell component                                                                    |
| Control          | MLS morphology. Poorly developed capillary network. Few lipoblasts. Some debris. No round cell component                                                                               |
| Control          | MLS morphology. Poorly developed capillary network. Some debris. No lipoblasts. No round cell component                                                                                |
| 17-DMAG          | MLS morphology. Small and hypocellular. No peripheral crowding. Some lipoblasts. No round cell component                                                                               |
| 17-DMAG          | MLS morphology. Small and hypocellular. No peripheral crowding. Poorly developed capillary network. Some debris. No lipoblasts. No round cell component                                |
| 17-DMAG          | MLS morphology. Hypocellular. Some peripheral crowding. Poorly developed capillary network. Abundant debris and necrosis. No lipoblasts. No round cell component                       |
| 17-DMAG          | MLS morphology. Peripheral crowding. Possibly more elaborate capillary network (difficult to assess). Abundant lipoblasts. Debris and necrosis. No round cell component                |
| AUY922           | MLS morphology. Cellular. No peripheral crowding. Elaborate capillary and vascular network. Diffuse bleeding around capillaries and hemorrhage. No lipoblasts. No round cell component |
| AUY922           | MLS morphology. Small. No peripheral crowding. Poorly developed capillary network. No lipoblasts. No round cell component                                                              |
| AUY922           | MLS morphology. A bit hypocellular. Some peripheral crowding. Poorly developed capillary network. Few lipoblasts. No round cell component                                              |



|                  |                                                                                                                                                       |
|------------------|-------------------------------------------------------------------------------------------------------------------------------------------------------|
| AUY922           | MLS morphology. Cellular. Peripheral crowding. More elaborate capillary network. Abundant lipoblasts. No round cell component, but some cells larger. |
| AUY922           | MLS morphology. Cellular. No peripheral crowding. Elaborate capillary network. Some debris. Few lipoblasts. No round cell component                   |
| AUY922           | MLS morphology. Peripheral crowding. Poorly developed capillary network. More lipoblasts. No round cell component                                     |
| AUY922           | MLS morphology. Cellular. Peripheral crowding. Sparse capillary network. Few lipoblasts. No round cell component                                      |
| STA-9090         | MLS morphology. Peripheral crowding. Possibly more elaborate capillary network (difficult to assess). Abundant lipoblasts. No round cell component    |
| STA-9090         | MLS morphology. No peripheral crowding. Poorly developed capillary network. Some debris. More lipoblasts. No round cell component                     |
| STA-9090         | MLS morphology. Peripheral crowding. More prominent capillary network. Few lipoblasts. No round cell component                                        |
| STA-9090         | MLS morphology. Some peripheral crowding. Poorly developed capillary network. Some debris and necrosis. More lipoblasts. No round cell component      |
| AUY922 → 17-DMAG | MLS morphology. Hypocellular. No peripheral crowding. Poorly developed capillary network. Some debris. No lipoblasts. No round cell component         |
| AUY922 → 17-DMAG | MLS morphology. No peripheral crowding. Poorly developed capillary network. Some debris. No lipoblasts. No round cell component                       |
| AUY922 → 17-DMAG | MLS morphology. Some peripheral crowding. Poorly developed capillary network. More debris and necrosis. Few lipoblasts. No round cell component       |
| AUY922 → 17-DMAG | MLS morphology. Peripheral crowding. Poorly developed capillary network. More debris. More lipoblasts. No round cell component                        |
| STA-9090 2 weeks | MLS morphology. Peripheral crowding. More elaborate capillary network and some dilated vessels. Abundant lipoblasts. No round cell component          |
| STA-9090 2 weeks | MLS morphology. Peripheral crowding. More elaborate capillary network and some dilated vessels. Abundant lipoblasts. No round cell component          |

**Table S2. Antibodies used for Western blot**

| Target            | Company/product nr     | Species | Dilution/Block | Size                                  |
|-------------------|------------------------|---------|----------------|---------------------------------------|
| DDIT3             | Proteintech 15204-1-Ap | Rabbit  | 1:1000 milk    | FUSDDIT3: 50-100 kDa<br>DDIT3: 30 kDa |
| EGFR              | Santa Cruz sc-03       | Rabbit  | 1:500 BSA      | 150-175 kDa                           |
| p-EGFR            | Cell signaling #2236   | Mouse   | 1:1000 BSA     | 150-175 kDa                           |
| ERBB3             | Santa Cruz sc-285      | Rabbit  | 1:100 BSA      | 150-170 kDa                           |
| p-ERBB3           | Cell signalling #4791  | Rabbit  | 1:1000 BSA     | 150-170 kDa                           |
| MEK1/2            | Cell signalling #9122  | Rabbit  | 1:1000 BSA     | 45 kDa                                |
| p-MEK1/2          | Cell signalling #4695  | Rabbit  | 1:1000 BSA     | 45 kDa                                |
| ERK1/2            | Cell signalling #4695  | Rabbit  | 1:1000 BSA     | 44 kDa                                |
| p-ERK1/2          | Cell signalling #4376  | Rabbit  | 1:1000 BSA     | 44 kDa                                |
| AKT               | Cell signalling #2967  | Mouse   | 1:1000 BSA     | 60 kDa                                |
| p-AKT             | Cell signalling #4051  | Mouse   | 1:1000 BSA     | 60 kDa                                |
| HSP90             | ABIN361665             | Mouse   | 1:2000 BSA     | 90 kDa                                |
| HSP70             | Santa Cruz sc-24       | Mouse   | 1:1000 BSA     | 70 kDa                                |
| Caspase 3         | Santa Cruz sc-7272     | Mouse   | 1:1000 BSA     | 34 kDa                                |
| Cleaved caspase 3 | Cell signalling #9664  | Rabbit  | 1:1000 BSA     | 17/19 kDa                             |
| Vinculin          | Sigma V4505            | Mouse   | 1:1000 BSA     | 117 kDa                               |
| GAPDH             | Proteintech 60004-1-Ig | Mouse   | 1:50 000 BSA   | 36 kDa                                |

**Table S3. Primers used and PCR product length**

| Gene          | Forward primer sequence | Reverse primer sequence | Length |
|---------------|-------------------------|-------------------------|--------|
| FUS-DDIT3 bp1 | GACCGTGGTGGCTTCAATAA    | CAGTGTCCCGAAGGAGAAA     | 147 bp |
| FUS-DDIT3 bp2 | AGCAGAACCAGTACAACAGC    | CCCGAAGGAGAAAGGCAATG    | 167 bp |

**Table S4. Summary of *In vitro* responses to HSP90 inhibition**

| <i>In vitro</i> response |                         |             |                       |                                |                                                                                       |                                           |                             |                             |
|--------------------------|-------------------------|-------------|-----------------------|--------------------------------|---------------------------------------------------------------------------------------|-------------------------------------------|-----------------------------|-----------------------------|
| Compound                 | MLS cell lines          | IC50 (72 h) | Cell cycle inhibition | Induction of Cleaved caspase 3 | Growth receptor response                                                              | MAPK signaling                            | Synergy score (doxorubicin) | Synergy score (trabectedin) |
| <u>17-DMAG</u>           | 402-91 (type 1 fusion)  | 17 nM       | G2/S inhibition       | +                              | Downregulation of ERBB3 (phosphorylation) and EGFR (total protein)                    | Downregulation of MAPK and AKT            | -0.8                        | 6.2                         |
|                          | 1765-92 (type 6 fusion) | 3 nM        | G2/S inhibition       | ++                             | Downregulation of ERBB3 (phosphorylation and total protein) and EGFR (total protein)  | Downregulation of MAPK and AKT            | N/A                         | N/A                         |
|                          | 2645-94 (type 2 fusion) | 4.2 nM      | G2/S inhibition       | +                              | Downregulation of ERBB3 (phosphorylation) and EGFR (total protein)                    | Downregulation of MAPK and AKT            | N/A                         | N/A                         |
| <u>AUY922</u>            | 402-91 (type 1 fusion)  | 5.3 nM      | G2/S inhibition       | +++                            | Downregulation of ERBB3 (phosphorylation) and EGFR (total protein)                    | Upregulation of ERK, no regulation of AKT | -0.2                        | 7.2                         |
|                          | 1765-92 (type 6 fusion) | 0.1 nM      | N/A                   | ++                             | Downregulation of ERBB3 (phosphorylation and total protein)<br>No regulation of EGFR  | Upregulation of ERK, no regulation of AKT | N/A                         | N/A                         |
|                          | 2645-94 (type 2 fusion) | 15 nM       | N/A                   | ++                             | Downregulation of ERBB3 (phosphorylation) and EGFR (total protein)                    | Downregulation of MAPK and AKT            | N/A                         | N/A                         |
| <u>STA-9090</u>          | 402-91 (type 1 fusion)  | 24 nM       | G2/S inhibition       | +++                            | Downregulation of ERBB3 (phosphorylation and total protein) and EGFR (total protein)  | Downregulation of MAPK and AKT            | 1.0                         | 7.2                         |
|                          | 1765-92 (type 6 fusion) | 4.9 nM      | N/A                   | ++                             | Downregulation of ERBB3 (phosphorylation and total protein),<br>No regulation of EGFR | Downregulation of MAPK and AKT            | N/A                         | N/A                         |
|                          | 2645-94 (type 2 fusion) | 15 nM       | N/A                   | ++                             | Downregulation of ERBB3 (phosphorylation) and EGFR (total protein)                    | Downregulation of MAPK and AKT            | N/A                         | N/A                         |

+ / ++ / +++ indicates <5 / 5-10 / >10 times elevation of protein expression levels compared to control. N/A indicates that experiment was not performed.

**Table S5. Summary of *In vivo* responses to HSP90 inhibition**

| <i>In vivo</i> response |                      |                    |                                          |                                                                                             |
|-------------------------|----------------------|--------------------|------------------------------------------|---------------------------------------------------------------------------------------------|
| Compound                | Tumor growth         | Toxicity           | Morphology                               | Other                                                                                       |
| <u>17-DMAG</u>          | Growth inhibition    | No toxicity        | Hypocellular.<br>More lipoblasts         | Shows treatment effect on tumors not responding to AUY922                                   |
| <u>AUY922</u>           | No growth inhibition | No toxicity        | Hypercellular,<br>pleomorphic morphology | -                                                                                           |
| <u>STA-9090</u>         | No growth inhibition | Slight weight loss | No difference to controls                | Short term treatment with toxic doses leads to tumor cell death and induction of lipoblasts |
